# Supplementary material
Source: Springer Nature journal article supplement (https://www.springermedizin.de/resource/supplementary/12902_2014_276_MOESM3_ESM.pdf/9515932)

# 24 H SAMPLING

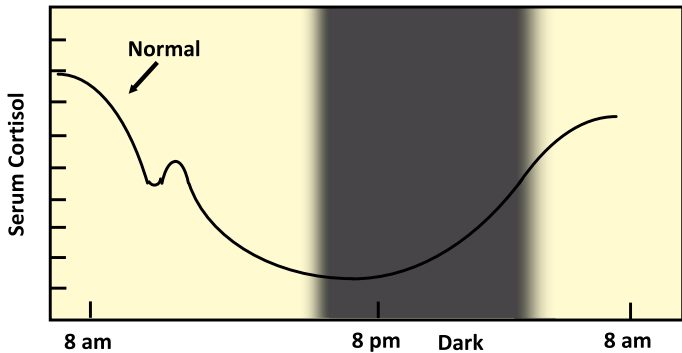

## CIRCADIAN TISSUE GLUCOCORTICOID SENSITIVITY/GR ACETYLATION

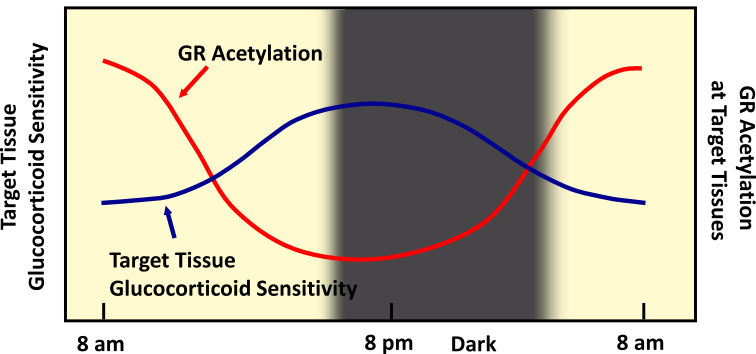

Supplement: MOESM3 [file 9515932]
